# Supplementary material for: Largely Enhanced Thermoelectric Power Factor of Flexible Cu2−xS Film by Doping Mn
Source: MDPI journal article supplement (doi:10.3390/ma16227159), 2023-11-14
Supplement: s1 [file s1]

## Supplementary Material

### Largely enhanced thermoelectric power factor of flexible $\text{Cu}_{2-x}\text{S}$ film by doping Mn

Xinru Zuo, Xiaowen Han, Yiming Lu, Ying Liu, Zixing Wang, Jiajia Li and Kefeng Cai\*

Key Laboratory of Advanced Civil Engineering Materials of Ministry of Education, Shanghai Key Laboratory of Development and Application for Metal-Functional Materials, School of Materials Science & Engineering, Tongji

University, Shanghai, 201804, China

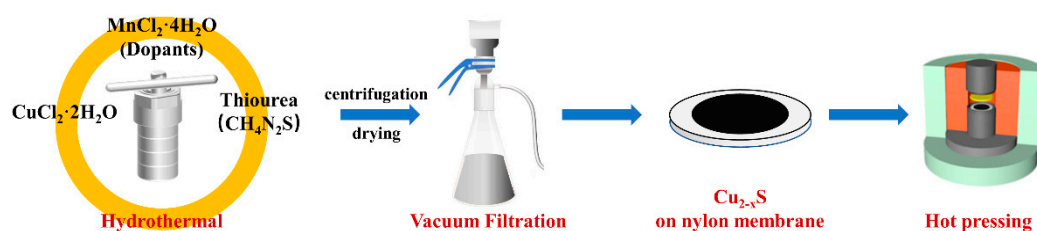

**Fig. S1.** Schematic diagram of the preparation process of the  $\text{Cu}_{2-x}\text{Mn}_y\text{S}$  film.

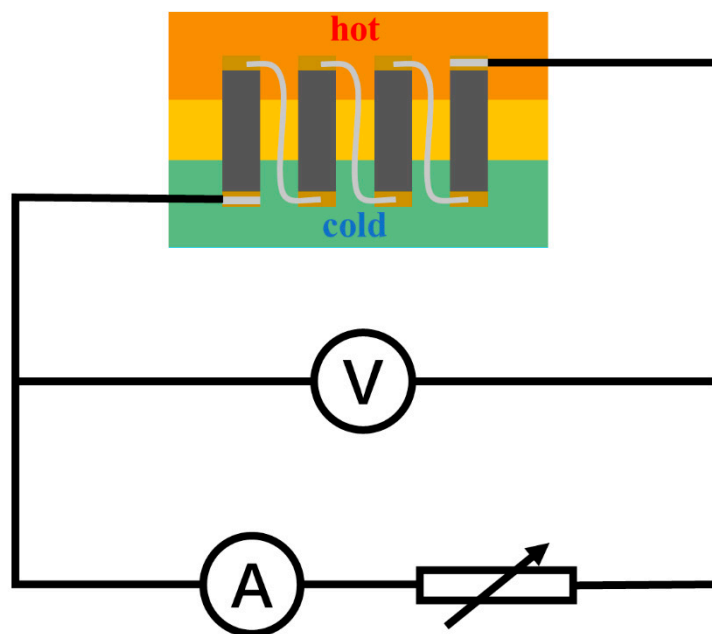

Fig. S2. A schematic diagram for the output performance measurement of the TE generator.

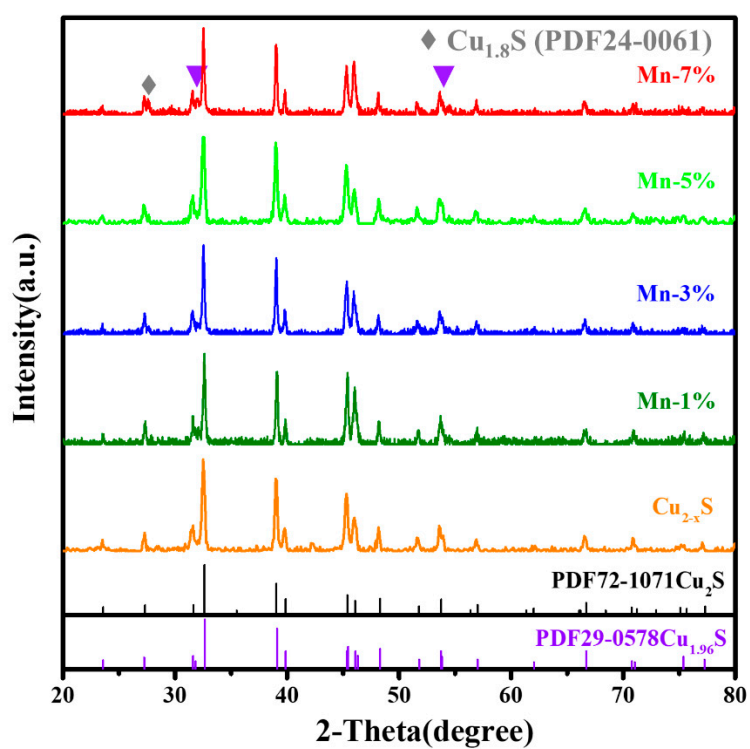

Fig. S3. XRD patterns of the  $\text{Cu}_{2-x}\text{Mn}_y\text{S}$  powders with varying doping content of Mn.

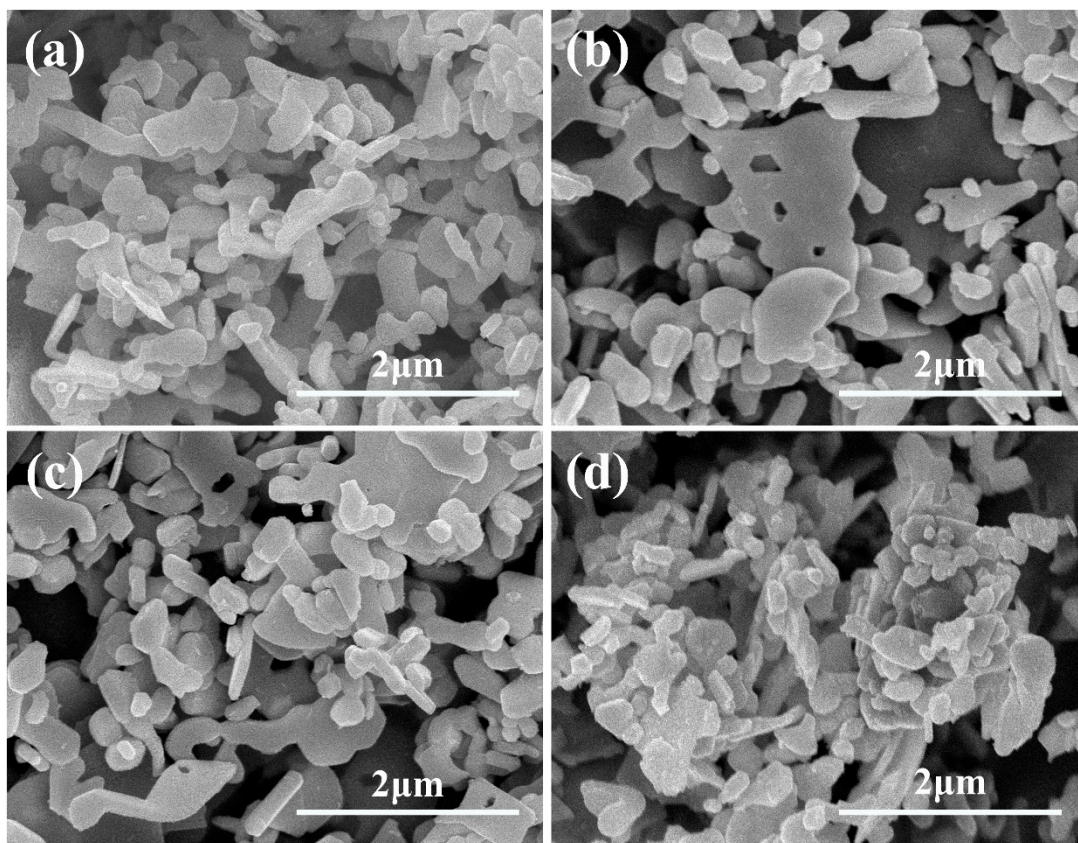

**Fig. S4.** SEM images of  $\text{Cu}_{2-x}\text{Mn}_y\text{S}$  powders. (a)  $y=0.01$ , (b)  $y=0.03$ , (c)  $y=0.05$ , (d)  $y=0.07$ .

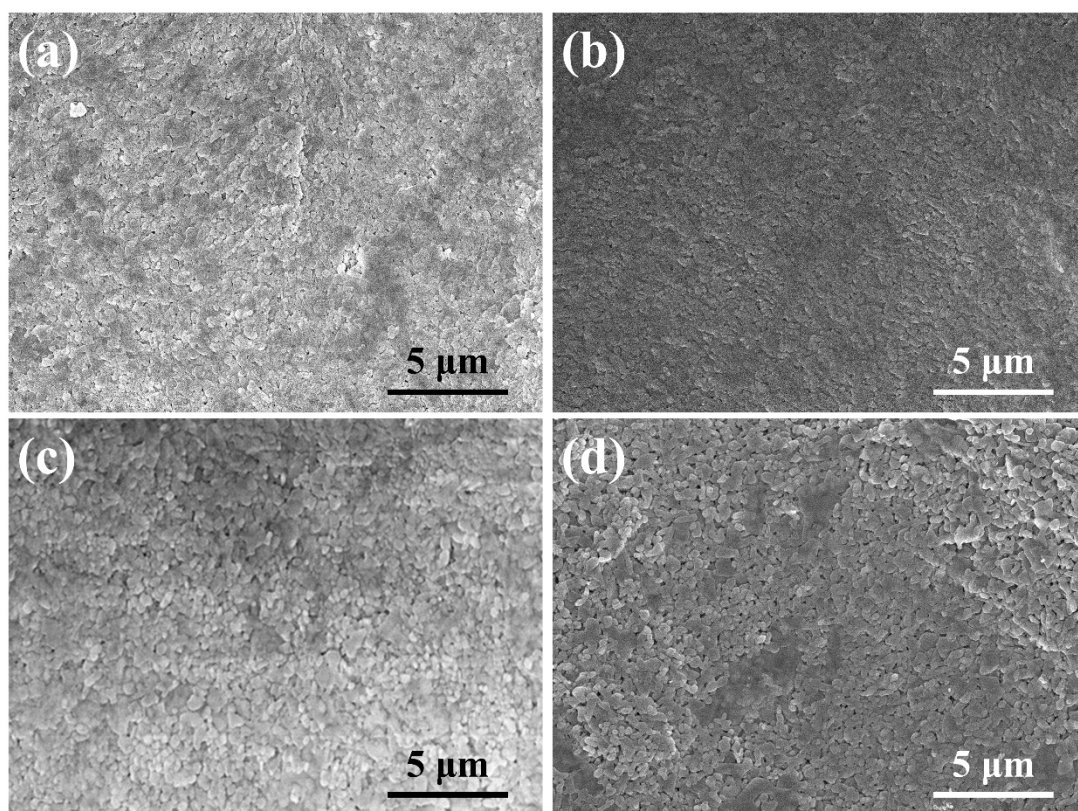



**Fig. S5.** SEM images of the  $\text{Cu}_{2-x}\text{Mn}_y\text{S}$  films. (a)  $y=0.01$ , (b)  $y=0.03$ , (c)  $y=0.05$ , (d)  $y=0.07$ .

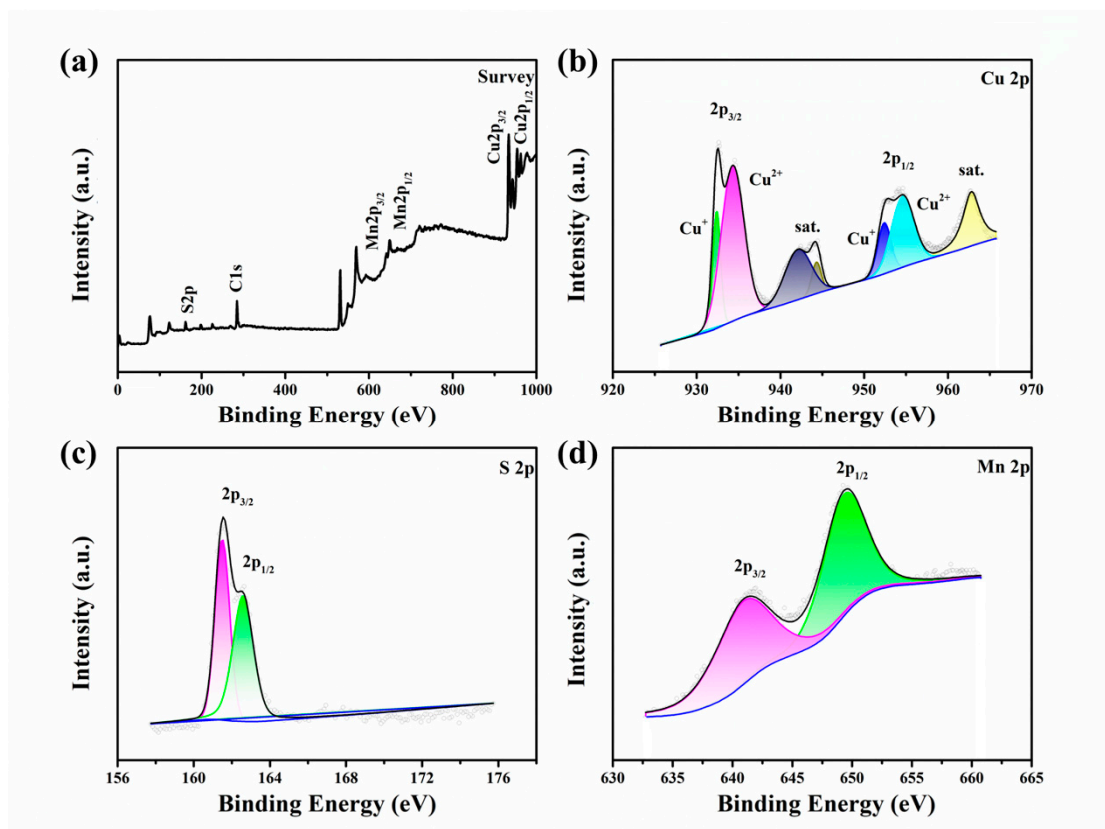

**Fig. S6.** XPS spectra of the  $\text{Cu}_{2-x}\text{Mn}_{0.05}\text{S}$  powders. (a) survey scan. (b-d) high-resolution scans for Cu 2p, S 2p and Mn 2p, respectively.

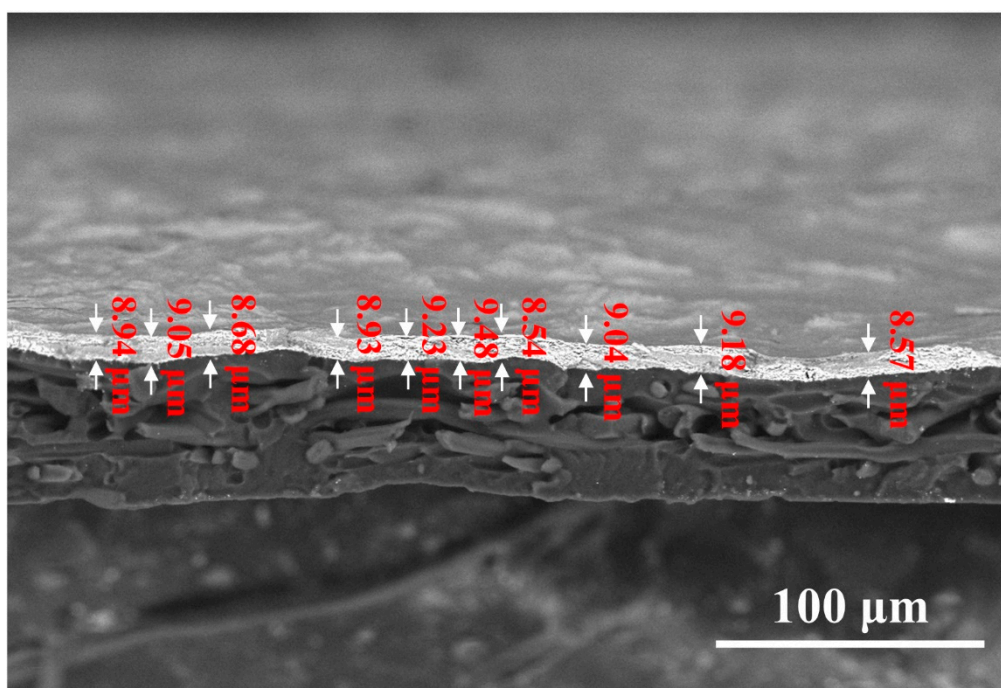

**Fig. S7.** Cross-sectional SEM image of the  $\text{Cu}_{2-x}\text{Mn}_{0.05}\text{S}$  film.

**Table S1.** The measured and estimated values of the open-circuit voltage ( $V_{oc}$ ) and maximum output power ( $P_{max}$ ) of the f-TEG at different  $\Delta T$ .

| $\Delta T$ (K) | $V_{oc}$ (mV)   |                  | $P_{max}$ (nW)  |                  |
|----------------|-----------------|------------------|-----------------|------------------|
|                | Measured values | Estimated values | Measured values | Estimated values |
| 10.3           | 5.74            | 5.65             | 29.92           | 30.2             |
| 21.3           | 11.86           | 11.69            | 123.87          | 129.4            |
| 30.1           | 16.65           | 16.53            | 249.48          | 258.7            |
